# Supplementary material for: Efficacy of high-frequency sonic irrigation on removing debris from root canal isthmus: an in vitro study based on simulated root canals
Source: PeerJ. 2025 May 12;13:e19445. doi: 10.7717/peerj.19445 (PMC12080472; doi:10.7717/peerj.19445)
Supplement: Supplemental Information 1 [file peerj-13-19445-s001.xlsx]

## Sheet: coronal
	S1	mean	SD	S2	mean	SD	(S1-S2)/S1	mean	SD
CNI	4.028	4.048	0.273302	3.678	3.7118	0.304008	0.0868918	0.0836409	0.0203473
	4.298			3.885			0.0960912
	3.76			3.369			0.103989
	3.802			3.497			0.0802209
	4.352			4.13			0.051011
EA	3.582	3.8186	0.357666	2.91	3.1486	0.36013	0.187605	0.176227	0.0305256
	3.925			3.056			0.221401
	3.712			3.123			0.158675
	4.387			3.768			0.141099
	3.487			2.886			0.172354
PUI	3.421	3.7314	0.323527	1.413	1.7154	0.206674	0.586963	0.540714	0.0332552
	3.422			1.609			0.529807
	3.688			1.815			0.507863
	4.112			1.798			0.562743
	4.014			1.942			0.516193
EDDY	3.856	3.8876	0.209915	0.548	0.5338	0.0638686	0.857884	0.86184	0.0224599
	3.962			0.548			0.861686
	3.541			0.591			0.833098
	3.998			0.558			0.86043
	4.081			0.424			0.896104

## Sheet: middle
	S1	mean	SD	S2	mean	SD	(S1-S2)/S1	mean	SD
CNI	2.882	3.4716	0.409951	2.687	3.2376	0.38026	0.0676613	0.0673553	0.00131667
	3.375			3.155			0.0651852
	3.473			3.239			0.0673769
	3.613			3.368			0.0678107
	4.015			3.739			0.0687422
EA	2.607	3.0498	0.34655	2.193	2.52	0.33728	0.158803	0.17401	0.0551779
	3.261			2.852			0.125422
	3.463			2.694			0.222062
	3.121			2.74			0.122076
	2.797			2.121			0.241688
PUI	2.509	3.2708	0.592101	1.471	1.6362	0.340402	0.413711	0.498401	0.063221
	3.771			1.81			0.520021
	3.199			1.552			0.514848
	2.932			1.229			0.580832
	3.943			2.119			0.462592
EDDY	3.264	3.1404	0.108999	0.714	0.8158	0.202422	0.78125	0.739558	0.0675082
	3.126			0.614			0.803583
	3.116			0.685			0.780167
	3.216			1.059			0.670709
	2.98			1.007			0.662081

## Sheet: apical
	S1	mean	SD	S2	mean	SD	(S1-S2)/S1	mean	SD
CNI	1.49	1.764	0.282695	1.44	1.6968	0.260907	0.033557	0.0372307	0.00764091
	1.816			1.738			0.0429515
	1.453			1.416			0.0254646
	1.991			1.909			0.0411853
	2.07			1.981			0.0429952
EA	1.407	1.7684	0.425535	1.15	1.5408	0.378047	0.182658	0.128864	0.0442779
	1.537			1.401			0.0884841
	1.435			1.276			0.110801
	2.225			2.019			0.0925843
	2.238			1.858			0.169794
PUI	1.707	1.8294	0.407077	1.038	1.27	0.306139	0.391916	0.304546	0.0659963
	2.447			1.767			0.277891
	1.932			1.243			0.356625
	1.334			1.001			0.249625
	1.727			1.301			0.246671
EDDY	1.908	2.1586	0.353474	1.329	1.4694	0.244367	0.303459	0.317789	0.0573582
	2.202			1.7			0.227975
	1.748			1.17			0.330664
	2.662			1.739			0.346732
	2.273			1.409			0.380114
